# Supplementary material
Source: PubMed Central journal article supplement (PMC7036040)
Supplement: 41588_2014_BFng3062_MOESM38_ESM.pdf [file 41588_2014_BFng3062_MOESM38_ESM.pdf]

## Supplementary Note

**NIH Genomic Data Sharing Governance Committees** (Participants are arranged by committee role, then alphabetically, as of November 2013.)

**Senior Oversight Committee:** Eric D. Green<sup>2</sup> (*Co-Chair*), Amy Patterson<sup>1</sup> (*Co-Chair*), Hugh Auchincloss<sup>8</sup>, Stephen J. Chanock<sup>4</sup>, Michael M. Gottesman<sup>9</sup>, Alan Guttmacher<sup>10</sup>, Thomas R. Insel<sup>11</sup>, Story Landis<sup>12</sup>, Sally Rockey<sup>13</sup>, Susan Shurin<sup>7</sup>, Barbara M. McGarey<sup>14</sup> (*Ex Officio*).

**Senior Oversight Committee Issues Group:** Dina Paltoo<sup>1</sup> (*Co-Chair*), Laura Lyman Rodriguez<sup>2</sup> (*Co-Chair*), Sally A. Amero<sup>13</sup>, Elizabeth Gillanders<sup>4</sup>, Maria Giovanni<sup>8</sup>, Katrina Gwinn<sup>12</sup>, Hilary Leeds<sup>7</sup>, Thomas Lehner<sup>11</sup>, Joni Rutter<sup>5</sup>, Richard Wyatt<sup>9</sup>, Valerie Bonham<sup>14</sup> (*Ex Officio*), Steve Sherry<sup>3</sup> (*Ex Officio*).

**Technical Standards and Data Submission Steering Committee:** Dina Paltoo<sup>1</sup> (*Co-Chair*), Joni Rutter<sup>5</sup> (*Co-Chair*), Charlissee Caga-Anan<sup>4</sup>, Mark Caulder<sup>5</sup>, Emily Chew<sup>15</sup>, Elaine Collier<sup>16</sup>, David Eckstein<sup>16</sup> (*Alternate*), Debbie Eng<sup>7</sup> (*Alternate*), Mike Feolo<sup>3</sup>, Elizabeth Gillanders<sup>4</sup>, Maria Giovanni<sup>8</sup>, Katrina Gwinn<sup>12</sup>, Emily Harris<sup>6</sup>, Tyl Hewitt<sup>10</sup>, Donna Krasnewich<sup>17</sup>, Holly Krull<sup>7</sup>, Thomas Lehner<sup>11</sup>, Punam Mathur<sup>8</sup> (*Alternate*), Kim McAllister<sup>18</sup>, Catherine McKeon<sup>19</sup>, Antonio Noronha<sup>20</sup>, Jim Ostell<sup>3</sup>, Vivian Ota Wang<sup>2</sup>, Vinay Pai<sup>21</sup>, Abbas Parsian<sup>20</sup>, Zhaoxia Ren<sup>10</sup> (*Alternate*), Winifred Rossi<sup>22</sup>, Geetha Senthil<sup>11</sup> (*Alternate*), William Sharrock<sup>23</sup>, Steve Sherry<sup>3</sup>, Derrick Tabor<sup>24</sup>, Geoff Tobias<sup>4</sup> (*Alternate*), Peggy Tucker<sup>4</sup>, Lois Tully<sup>25</sup>, Bracie Watson<sup>26</sup>, Ran Zhang<sup>12</sup> (*Alternate*), Lora Ziyabari<sup>3</sup>, Camilla Day<sup>2</sup>, (*Ex Officio*).

**Participant Protection and Data Management Steering Committee:** Elizabeth Gillanders<sup>4</sup> (*Co-Chair*), Laura Lyman Rodriguez<sup>2</sup> (*Co-Chair*), Hemin Chin<sup>15</sup>, Valentina Di Francesco<sup>8</sup>, David Eckstein<sup>16</sup>, Michelle Freund<sup>11</sup>, Katrina Gwinn<sup>12</sup>, Emily Harris<sup>6</sup>, John Ilekis<sup>12</sup>, Holly Krull<sup>2</sup>, Punam Mathur<sup>8</sup> (*Alternate*), Kimberly McAllister<sup>18</sup>, Vivian Ota Wang<sup>2</sup>, Vinay Pai<sup>21</sup>, Erin M. Ramos<sup>2</sup>, Rebekah Rasooly<sup>19</sup>, Joni Rutter<sup>5</sup>, William Sharrock<sup>23</sup>, Geoff Tobias<sup>4</sup> (*Alternate*), Peggy Tucker<sup>4</sup>, Lois Tully<sup>25</sup>, Ran Zhang<sup>12</sup> (*Alternate*), Sally Amero<sup>13</sup> (*Ex Officio*), Valerie Bonham<sup>14</sup> (*Ex Officio*), Charlotte Holden<sup>9</sup> (*Ex Officio*), Hilary Leeds<sup>7</sup> (*Ex Officio*).

1. Office of Science Policy, Office of the Director, National Institutes of Health, Bethesda, Maryland, USA.
2. National Human Genome Research Institute, National Institutes of Health, Bethesda, Maryland, USA.
3. National Center for Biotechnology Information, National Library of Medicine, National Institutes of Health, Bethesda, Maryland, USA.
4. National Cancer Institute, National Institutes of Health, Bethesda, Maryland, USA.
5. National Institute on Drug Abuse, National Institutes of Health, Bethesda, Maryland, USA.
6. National Institute of Dental and Craniofacial Research, National Institutes of Health, Bethesda, Maryland, USA.
7. National Heart, Lung, and Blood Institute, National Institutes of Health, Bethesda, Maryland, USA.
8. National Institute of Allergy and Infectious Diseases, National Institutes of Health, Bethesda, Maryland, USA.
9. Office of Intramural Research, Office of the Director, National Institutes of Health, Bethesda, Maryland, USA.

10. Eunice Kennedy Shriver National Institute of Child Health and Human Development, National Institutes of Health, Bethesda, Maryland, USA.
11. National Institute of Mental Health, National Institutes of Health, Bethesda, Maryland, USA.
12. National Institute of Neurological Disorders and Stroke, National Institutes of Health, Bethesda, Maryland, USA.
13. Office of Extramural Research, Office of the Director, National Institutes of Health, Bethesda, Maryland, USA.
14. Office of the General Council, Public Health Division, National Institutes of Health, Bethesda, Maryland, USA.
15. National Eye Institute, National Institutes of Health, Bethesda, Maryland, USA.
16. National Center for Advancing Translational Sciences, National Institutes of Health, Bethesda, Maryland, USA.
17. National Institute of General Medical Sciences, National Institutes of Health, Bethesda, Maryland, USA.
18. National Institute of Environmental Health Sciences, National Institutes of Health, Research Triangle Park, North Carolina, USA
19. National Institute of Diabetes and Digestive and Kidney Diseases, National Institutes of Health, Bethesda, Maryland, USA.
20. National Institute on Alcohol Abuse and Alcoholism, National Institutes of Health, Bethesda, Maryland, USA.
21. National Institute of Biomedical Imaging and Bioengineering, National Institutes of Health, Bethesda, Maryland, USA.
22. National Institute on Aging, National Institutes of Health, Bethesda, Maryland, USA.
23. National Institute of Arthritis and Musculoskeletal and Skin Diseases, National Institutes of Health, Bethesda, Maryland, USA.
24. National Institute on Minority Health and Health Disparities, National Institutes of Health, Bethesda, Maryland, USA.
25. National Institute of Nursing Research, National Institutes of Health, Bethesda, Maryland, USA.
26. National Institute on Deafness and Other Communication Disorders, National Institutes of Health, Bethesda, Maryland, USA.

**Supplementary Table 1: Publications reporting secondary analyses of dbGaP data as of November 1, 2013, and Total Citations as of March 1, 2014**

| <b># Publications</b> | <b>Journal</b>                     | <b>Total Citations</b> |
|-----------------------|------------------------------------|------------------------|
| 93                    | PLoS One                           | 837                    |
| 69                    | Nature Genetics                    | 9060                   |
| 50                    | BMC Proceedings                    | 175                    |
| 49                    | PLoS Genetics                      | 1815                   |
| 32                    | Genetic Epidemiology               | 235                    |
| 32                    | Molecular Psychiatry               | 1219                   |
| 31                    | American Journal of Human Genetics | 667                    |
| 28                    | Human Molecular Genetics           | 771                    |
| 22                    | Bioinformatics                     | 221                    |
| 22                    | Nature                             | 6259                   |

Listed are the number of publications for the top ten journals publishing findings of secondary analyses of dbGaP data. Citations were counted from Scopus, and citation information for publications that were not available through Scopus was gathered from PubMed Central.

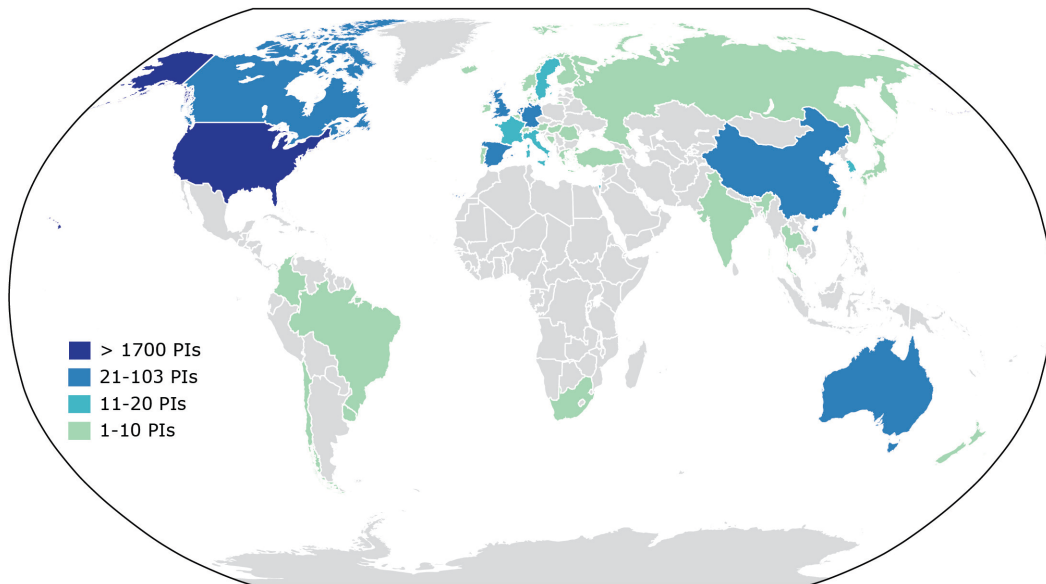

Number of Requesting Investigators by Country

**Supplementary Fig. 1.** Geographic location of investigators approved for using dbGaP data. Approximately 2,221 investigators and 6,800 collaborators from 41 different countries have been approved to use dbGaP data (as of November 2013). 77% of the approved investigators are from the United States. Countries with 10 or more approved investigators are Australia, Canada, China, France, Germany, Israel, Italy, Japan, Netherlands, Singapore, South Korea, Spain, Sweden, Switzerland, Taiwan, United Kingdom, and United States.

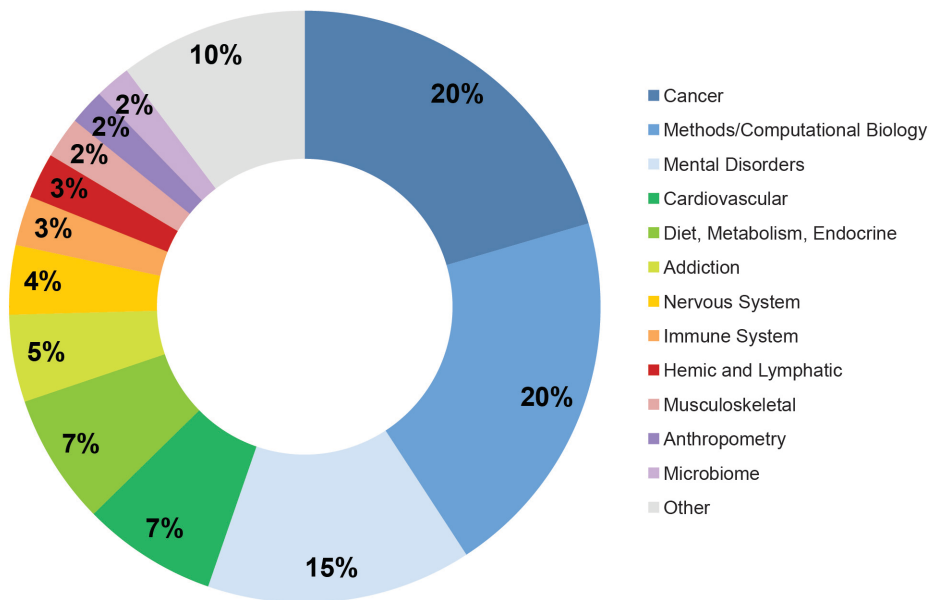

**Supplementary Fig. 2.** Distribution of 924 publications reporting secondary analyses of dbGaP data across study categories. Studies in the “Other” category include digestive disorders, respiratory and environment, behavior and cognition, skin and connective tissue, population genetics, urogenital, reproductive health, congenital, and multiple other diseases.
